# Supplementary material for: Assessment of different isotope dilution strategies and their combination with switchable solvent-based liquid phase microextraction prior to the quantification of bisphenol A at trace levels via GC-MS
Source: Royal Society of Chemistry journal article supplement (doi:10.1039/d0nj02706e), 2020-01-01
Supplement: d0nj02706e1.pdf [file d0nj02706e1.pdf]

**Assessment of different isotope dilution strategies and combination with switchable solvent liquid phase microextraction prior to quantification of bisphenol A at trace levels by GC-MS**

Süleyman Bodur<sup>1</sup>, Sezin Erarpat<sup>1</sup>, Dotse Selali Chormey<sup>1</sup>, Gamze Dalgıç Bozyiğit<sup>2</sup>, Ersoy Öz<sup>3</sup>, Nizamettin Özdoğan<sup>4</sup>, Sezgin Bakırdere<sup>1,5\*</sup>

<sup>1</sup>*Yıldız Technical University, Faculty of Art and Science, Department of Chemistry, 34220 Davutpasa, Esenler, İstanbul, Turkey*

<sup>2</sup>*Yıldız Technical University, Faculty of Civil Engineering, Department of Environmental Engineering, 34220 İstanbul, Turkey*

<sup>3</sup>*Yıldız Technical University, Faculty of Arts and Sciences, Department of Statistics, ,34220, Davutpasa, Esenler, İstanbul, Turkey*

<sup>4</sup>*Bülent Ecevit University, Institute of Science, Department of Environmental Engineering, 67100, Zonguldak, Turkey*

<sup>5</sup>*Turkish Academy of Sciences, Piyade Sokak No: 27, Çankaya, 06690, Ankara, Turkey*

***Supplementary Material 1***

**\*Corresponding author:** Sezgin Bakırdere, email: bsezgin23@yahoo.com, Phone: +902123834245

**Table S1.** Operating conditions of the GC-MS system.

| <b>Parameter</b>          | <b>Value</b>                 |
|---------------------------|------------------------------|
| Injection Mode            | Splitless                    |
| Inlet Temperature         | 280 °C                       |
| Injection Volume          | 1.0 µL                       |
| Transfer Line Temperature | 280 °C                       |
| MS source temperature     | 230 °C                       |
| MS quad temperature       | 150 °C                       |
| Carrier gas (flow rate)   | Helium (1.2 mL/min)          |
| Temperature Ramp 1        | 120 °C to 220 °C (60 °C/min) |
| Temperature Ramp 2        | 220 °C to 300 °C (30 °C/min) |

**\*Corresponding author:** Sezgin Bakirdere, email: bsezgin23@yahoo.com, Phone: +902123834245

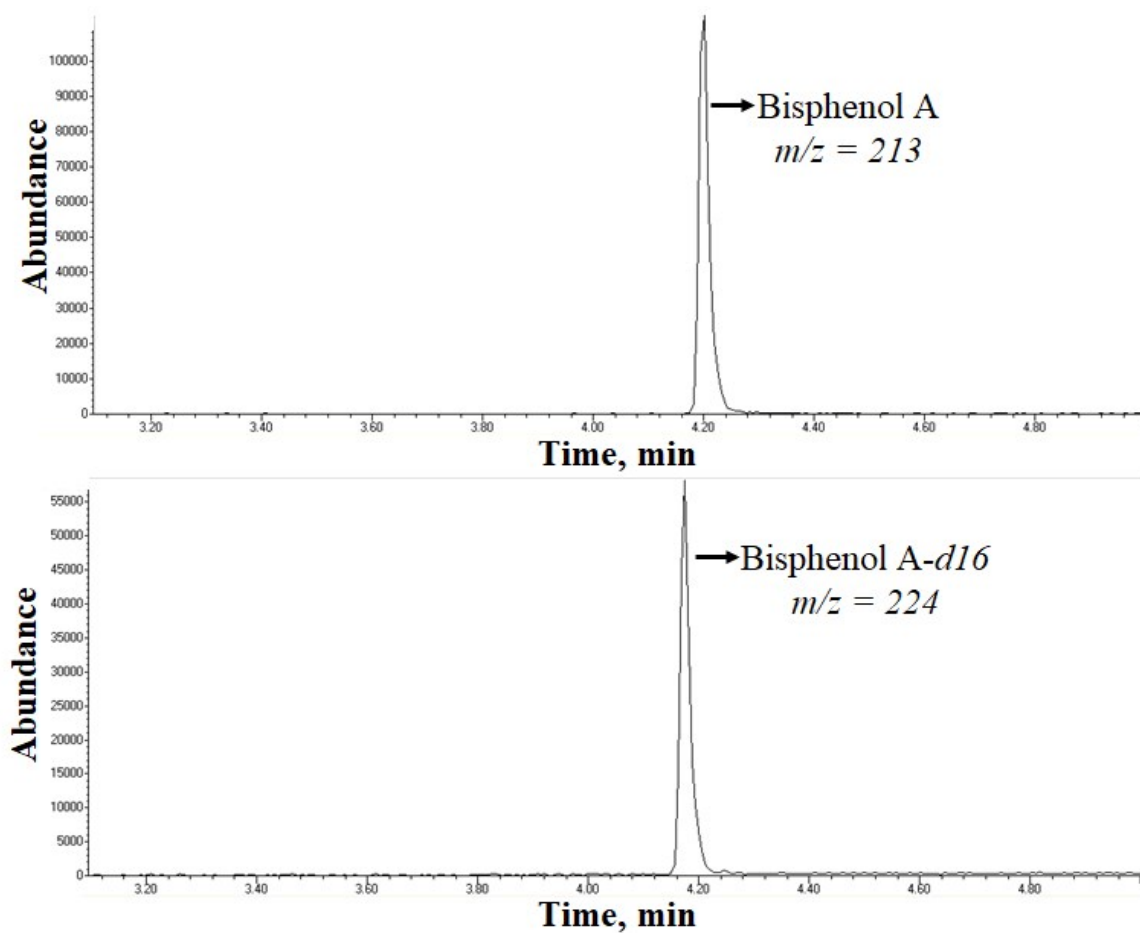

**Figure S1.** Chromatograms for 5.0 mg/kg of BPA ( $m/z = 213$ ) and BPA-*d16* ( $m/z = 224$ ) in SIM mode.

**\*Corresponding author:** Sezgin Bakirdere, email: bsezgin23@yahoo.com, Phone: +902123834245

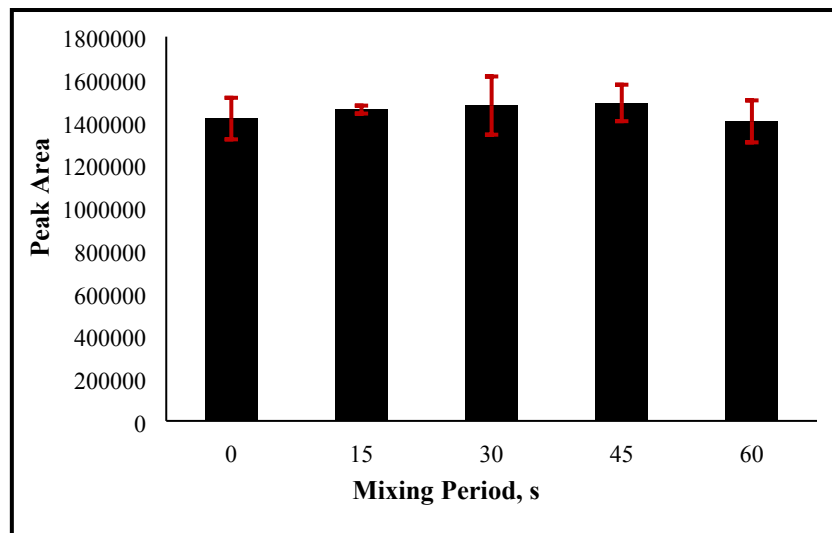

**Figure S2.** Optimization of vortex period after switchable solvent addition.

*\*Corresponding author: Sezgin Bakirdere, email: bsezgin23@yahoo.com, Phone: +902123834245*

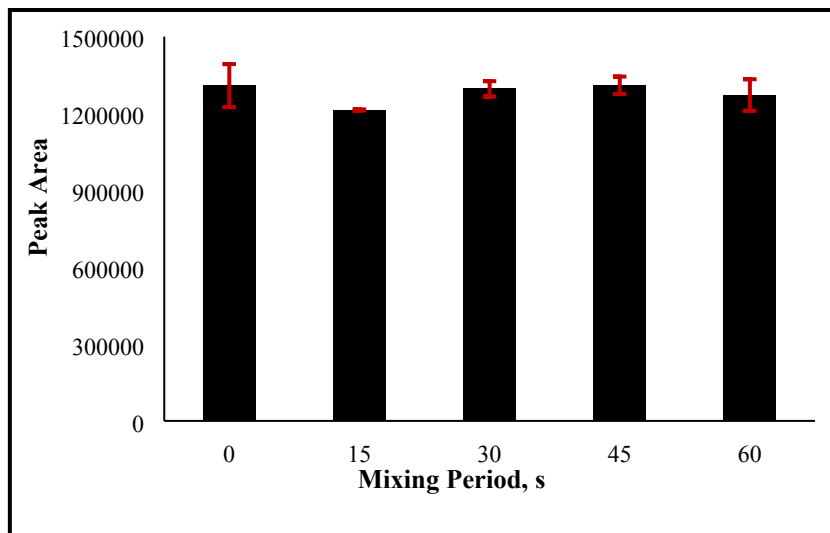

**Figure S3.** Optimization of mixing period after sodium hydroxide addition.

*\*Corresponding author: Sezgin Bakirdere, email: bsezgin23@yahoo.com, Phone: +902123834245*

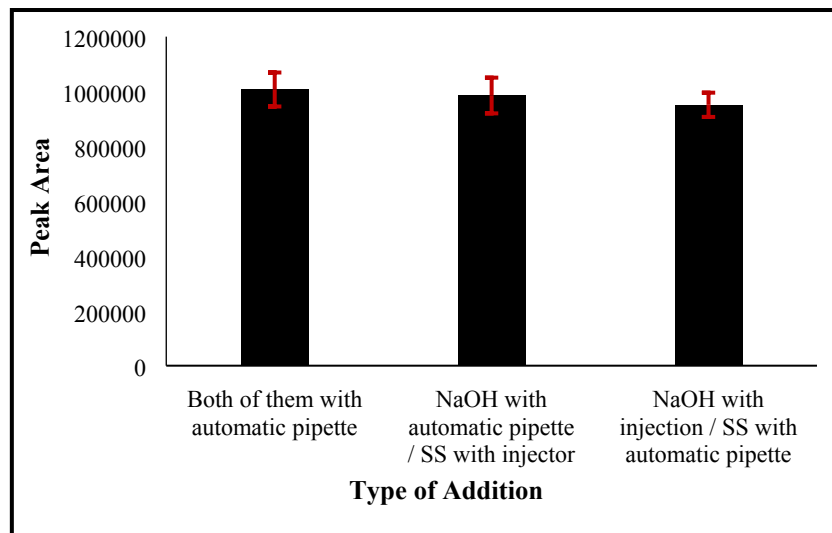

**Figure S4.** Type of switchable solvent and sodium hydroxide addition (SS: switchable solvent).

*\*Corresponding author: Sezgin Bakirdere, email: bsezgin23@yahoo.com, Phone:*

*+902123834245*
