# Supplementary material for: Assessment of different isotope dilution strategies and their combination with switchable solvent-based liquid phase microextraction prior to the quantification of bisphenol A at trace levels via GC-MS
Source: Royal Society of Chemistry journal article supplement (doi:10.1039/d0nj02706e), 2020-01-01
Supplement: d0nj02706e2.pdf [file d0nj02706e2.pdf]

**Assessment of different isotope dilution strategies and combination with switchable solvent liquid phase microextraction prior to quantification of bisphenol A at trace levels by GC-MS**

Süleyman Bodur<sup>1</sup>, Sezin Erarpat<sup>1</sup>, Dotse Selali Chormey<sup>1</sup>, Gamze Dalgıç Bozyiğit<sup>2</sup>, Ersoy Öz<sup>3</sup>, Nizamettin Özdoğan<sup>4</sup>, Sezgin Bakırdere<sup>1,5\*</sup>

<sup>1</sup>*Yıldız Technical University, Faculty of Art and Science, Department of Chemistry, 34220 Davutpasa, Esenler, İstanbul, Turkey*

<sup>2</sup>*Yıldız Technical University, Faculty of Civil Engineering, Department of Environmental Engineering, 34220 İstanbul, Turkey*

<sup>3</sup>*Yıldız Technical University, Faculty of Arts and Sciences, Department of Statistics, ,34220, Davutpasa, Esenler, İstanbul, Turkey*

<sup>4</sup>*Bülent Ecevit University, Institute of Science, Department of Environmental Engineering, 67100, Zonguldak, Turkey*

<sup>5</sup>*Turkish Academy of Sciences, Piyade Sokak No: 27, Çankaya, 06690, Ankara, Turkey*

***Supplementary Material 2***

Compositions of all blends with their target isotope ratios for all isotope dilution strategies are given in the following tables.

**\*Corresponding author:** Sezgin Bakırdere, email: bsezgin23@yahoo.com, Phone: +902123834245

**Table S1.** Notations and description of symbols.

| <b>Symbol</b>        | <b>Description</b>                                                                                         |
|----------------------|------------------------------------------------------------------------------------------------------------|
| <b>A*</b>            | Standard of the analyte                                                                                    |
| <b>A</b>             | Sample (containing the analyte)                                                                            |
| <b>B</b>             | Labelled material of the analyte                                                                           |
| <b>m<sub>x</sub></b> | Mass of the standard/sample solution, labelled solution of the analyte or deionized water x: A, A*, B or w |

*\*Corresponding author: Sezgin Bakirdere, email: bsezgin23@yahoo.com, Phone: +902123834245*

---

| <b>Blends</b> | <b>m<sub>A, A*</sub>, g</b> | <b>m<sub>B</sub>, g</b> | <b>Target isotope ratio</b> |
|---------------|-----------------------------|-------------------------|-----------------------------|
| <b>A*B</b>    | 0.60                        | 0.60                    | 1.11                        |
| <b>AB</b>     | 0.60                        | 0.60                    | 1.11                        |

---

**Table S2.** Compositions of all blends with their target isotope ratios for ID<sup>2</sup>-GC-MS.

**\*Corresponding author:** Sezgin Bakirdere, email: bsezgin23@yahoo.com, Phone:  
+902123834245

---

| <b>Blends</b> | <b>m<sub>A,A*</sub>, g</b> | <b>m<sub>B</sub>, g</b> | <b>Target isotope ratio</b> |
|---------------|----------------------------|-------------------------|-----------------------------|
| <b>A*B-1</b>  | 0.80                       | 0.40                    | 2.22                        |
| <b>A*B-2</b>  | 0.60                       | 0.60                    | 1.11                        |
| <b>AB</b>     | 0.60                       | 0.60                    | 1.11                        |

---

**Table S3.** Compositions of all blends with their target isotope ratios for ID<sup>3</sup>-GC-MS.

*\*Corresponding author: Sezgin Bakirdere, email: bsezgin23@yahoo.com, Phone: +902123834245*

---

| <b>Blends</b> | <b>m<sub>A,A*</sub>, g</b> | <b>m<sub>B</sub>, g</b> | <b>Target isotope ratio</b> |
|---------------|----------------------------|-------------------------|-----------------------------|
| <b>A*B-1</b>  | 0.80                       | 0.40                    | 2.22                        |
| <b>A*B-2</b>  | 0.60                       | 0.60                    | 1.11                        |
| <b>A*B-3</b>  | 0.40                       | 0.80                    | 0.57                        |
| <b>AB</b>     | 0.60                       | 0.60                    | 1.11                        |

---

**Table S4.** Compositions of all blends with their target isotope ratios for ID<sup>4</sup>-GC-MS.

*\*Corresponding author: Sezgin Bakirdere, email: bsezgin23@yahoo.com, Phone: +902123834245*

**Table S5.** Compositions of all blends with their target isotope ratios for SA-ID<sup>2</sup>-GC-MS

| <b>Blends</b> | <b>m<sub>A*</sub>, g</b> | <b>m<sub>A</sub>, g</b> | <b>m<sub>B</sub>, g</b> | <b>m<sub>w</sub>, g</b> | <b>Target isotope ratio</b> |
|---------------|--------------------------|-------------------------|-------------------------|-------------------------|-----------------------------|
| A*AB-1        | -                        | 0.40                    | 0.40                    | 0.40                    | 1.11                        |
| A*AB-2        | 0.40                     | 0.40                    | 0.40                    | -                       | 2.20                        |

*\*Corresponding author: Sezgin Bakirdere, email: bsezgin23@yahoo.com, Phone: +902123834245*

**Table S6.** Compositions of all blends with their target isotope ratios for SA-ID<sup>3</sup>-GC-MS

| <b>Blends</b> | <b>m<sub>A*</sub>, g</b> | <b>m<sub>A</sub>, g</b> | <b>m<sub>B</sub>, g</b> | <b>m<sub>w</sub>, g</b> | <b>Target isotope ratio</b> |
|---------------|--------------------------|-------------------------|-------------------------|-------------------------|-----------------------------|
| A*AB-1        | -                        | 0.40                    | 0.40                    | 0.40                    | 1.11                        |
| A*AB-2        | 0.40                     | 0.40                    | 0.40                    | -                       | 2.02                        |
| A*AB-3        | 0.20                     | 0.40                    | 0.60                    | -                       | 1.11                        |

**\*Corresponding author:** Sezgin Bakirdere, email: bsezgin23@yahoo.com, Phone: +902123834245
