# Supplementary material for: Assessment of different isotope dilution strategies and their combination with switchable solvent-based liquid phase microextraction prior to the quantification of bisphenol A at trace levels via GC-MS
Source: Royal Society of Chemistry journal article supplement (doi:10.1039/d0nj02706e), 2020-01-01
Supplement: d0nj02706e3.pdf [file d0nj02706e3.pdf]

**Assessment of different isotope dilution strategies and combination with switchable solvent liquid phase microextraction prior to quantification of bisphenol A at trace levels by GC-MS**

Süleyman Bodur<sup>1</sup>, Sezin Erarpat<sup>1</sup>, Dotse Selali Chormey<sup>1</sup>, Gamze Dalgıç Bozyiğit<sup>2</sup>, Ersoy Öz<sup>3</sup>, Nizamettin Özdoğan<sup>4</sup>, Sezgin Bakırdere<sup>1,5\*</sup>

<sup>1</sup>*Yıldız Technical University, Faculty of Art and Science, Department of Chemistry, 34220 Davutpasa, Esenler, İstanbul, Turkey*

<sup>2</sup>*Yıldız Technical University, Faculty of Civil Engineering, Department of Environmental Engineering, 34220 İstanbul, Turkey*

<sup>3</sup>*Yıldız Technical University, Faculty of Arts and Sciences, Department of Statistics, ,34220, Davutpasa, Esenler, İstanbul, Turkey*

<sup>4</sup>*Bülent Ecevit University, Institute of Science, Department of Environmental Engineering, 67100, Zonguldak, Turkey*

<sup>5</sup>*Turkish Academy of Sciences, Piyade Sokak No: 27, Çankaya, 06690, Ankara, Turkey*

***Supplementary Material 3***

Quadruplicate measurements were carried out by the GC-MS system for all blends. The mean values of the isotope ratios for all blends were utilized in calculating mass fraction of the analyte in the sample. The preparation and combination of the blends are clarified in the relevant tables for the isotope dilution strategies applied in this study.

**\*Corresponding author:** Sezgin Bakırdere, email: bsezgin23@yahoo.com, Phone: +902123834245

**Table S1.** Notation and description of symbols.

| <b>Symbol</b>        | <b>Description</b>                                                                                         |
|----------------------|------------------------------------------------------------------------------------------------------------|
| <b>A*</b>            | Standard of the analyte                                                                                    |
| <b>A</b>             | Sample (containing the analyte)                                                                            |
| <b>B</b>             | Labelled material of the analyte                                                                           |
| <b>m<sub>x</sub></b> | Mass of the standard/sample solution, labelled solution of the analyte or deionized water x: A, A*, B or w |
| <b>r<sub>x</sub></b> | Ratio of peak areas, x: A*/B or A/B                                                                        |
| <b>PA</b>            | Peak area of the analyte or its isotope                                                                    |
| <b>w<sub>A</sub></b> | Mass fraction of the analyte                                                                               |
| <b>Eu</b>            | Mean of experimental mass fraction of the analyte                                                          |
| <b>Et</b>            | Theoretical mass fraction of the analyte                                                                   |

*\*Corresponding author: Sezgin Bakirdere, email: bsezgin23@yahoo.com, Phone:*

*+902123834245*

**Table S2.** Blends preparation for ID<sup>2</sup>-GC-MS.

| <b>Blends</b>                 | <b>Code</b> | <b>m<sub>A*</sub>, g</b> | <b>m<sub>B</sub>, g</b> | <b>r<sub>A*/A/B</sub>, PA/PA</b> |
|-------------------------------|-------------|--------------------------|-------------------------|----------------------------------|
| <b>Calibration<br/>Blends</b> | A*B-a       | 0.604                    | 0.601                   | 2.25                             |
|                               | A*B-b       | 0.606                    | 0.598                   | 2.42                             |
|                               | A*B-c       | 0.600                    | 0.598                   | 2.17                             |
| <b>Sample Blends</b>          | AB-a        | 0.602                    | 0.596                   | 2.39                             |
|                               | AB-b        | 0.600                    | 0.598                   | 2.31                             |
|                               | AB-c        | 0.604                    | 0.600                   | 2.27                             |

*\*Corresponding author: Sezgin Bakirdere, email: bsezgin23@yahoo.com, Phone: +902123834245*

**Table S3.** Theoretical and experimental concentrations of the analyte, percent recovery results and percent relative standard deviation for ID<sup>2</sup>-GC-MS.

| Combination, x-y | w <sub>A</sub> , µg/g | Eu (w <sub>A</sub> ), µg/g | Et (w <sub>A</sub> ), µg/g | Recovery, % | RSD% |
|------------------|-----------------------|----------------------------|----------------------------|-------------|------|
| a-a              | 10.62                 |                            |                            |             |      |
| b-a              | 9.90                  |                            |                            |             |      |
| c-a              | 10.97                 |                            |                            |             |      |
| a-b              | 10.29                 |                            |                            |             |      |
| b-b              | 9.59                  | 10.22                      | 9.99                       | 102.3       | 5.0  |
| c-b              | 10.63                 |                            |                            |             |      |
| a-c              | 10.10                 |                            |                            |             |      |
| b-c              | 9.42                  |                            |                            |             |      |
| c-c              | 10.44                 |                            |                            |             |      |

\*x-y define the blends, x: a, b or c, y: a, b or c

**\*Corresponding author:** Sezgin Bakirdere, email: bsezgin23@yahoo.com, Phone: +902123834245

**Table S4.** Blends preparation for ID<sup>3</sup>-GC-MS

| <b>Blends</b>                 | <b>Code</b> | <b>m<sub>A*</sub>, g</b> | <b>m<sub>B</sub>, g</b> | <b>r<sub>A*/B</sub>, PA/PA</b> |
|-------------------------------|-------------|--------------------------|-------------------------|--------------------------------|
| <b>Calibration<br/>Blends</b> | A*B-1-a     | 0.801                    | 0.400                   | 3.74                           |
|                               | A*B-1-b     | 0.804                    | 0.403                   | 3.71                           |
|                               | A*B-1-c     | 0.801                    | 0.407                   | 3.74                           |
|                               | A*B-2-a     | 0.603                    | 0.600                   | 2.14                           |
|                               | A*B-2-b     | 0.601                    | 0.603                   | 2.07                           |
|                               | A*B-2-c     | 0.603                    | 0.601                   | 2.16                           |
| <b>Sample Blends</b>          | AB-a        | 0.601                    | 0.601                   | 2.17                           |
|                               | AB-b        | 0.601                    | 0.598                   | 2.19                           |
|                               | AB-c        | 0.603                    | 0.600                   | 2.20                           |

*\*Corresponding author: Sezgin Bakirdere, email: bsezgin23@yahoo.com, Phone:*

*+902123834245*

**Table S5.** Theoretical and experimental concentrations of the analyte, percent recovery results and percent relative standard deviation for ID<sup>3</sup>-GC-MS.

| Combination, x-y-z | W <sub>A</sub> ,<br>μg/g | Eu (w <sub>A</sub> ), μg/g | Et (w <sub>A</sub> ), μg/g | Recovery, % | RSD% |
|--------------------|--------------------------|----------------------------|----------------------------|-------------|------|
| 1a-2a-1a           | 10.23                    |                            |                            |             |      |
| 1a-2a-1b           | 10.33                    |                            |                            |             |      |
| 1a-2a-1c           | 10.41                    |                            |                            |             |      |
| 1a-2b-1a           | 10.56                    |                            |                            |             |      |
| 1a-2b-1b           | 10.65                    |                            |                            |             |      |
| 1a-2b-1c           | 10.72                    |                            |                            |             |      |
| 1a-2c-1a           | 10.29                    |                            |                            |             |      |
| 1a-2c-1b           | 10.16                    |                            |                            |             |      |
| 1a-2c-1c           | 10.23                    |                            |                            |             |      |
| 1b-2a-1a           | 10.24                    |                            |                            |             |      |
| 1b-2a-1b           | 10.33                    |                            |                            |             |      |
| 1b-2a-1c           | 10.41                    |                            |                            |             |      |
| 1b-2b-1a           | 10.56                    |                            |                            |             |      |
| 1b-2b-1b           | 10.65                    | 9.99                       | 10.37                      | 103.8       | 2.1  |
| 1b-2b-1c           | 10.73                    |                            |                            |             |      |
| 1b-2c-1a           | 10.06                    |                            |                            |             |      |
| 1b-2c-1b           | 10.16                    |                            |                            |             |      |
| 1b-2c-1c           | 10.24                    |                            |                            |             |      |
| 1c-2a-1a           | 10.23                    |                            |                            |             |      |
| 1c-2a-1b           | 10.32                    |                            |                            |             |      |
| 1c-2a-1c           | 10.39                    |                            |                            |             |      |
| 1c-2b-1a           | 10.54                    |                            |                            |             |      |
| 1c-2b-1b           | 10.62                    |                            |                            |             |      |
| 1c-2b-1c           | 10.69                    |                            |                            |             |      |
| 1c-2c-1a           | 10.06                    |                            |                            |             |      |
| 1c-2c-1b           | 10.15                    |                            |                            |             |      |
| 1c-2c-1c           | 10.23                    |                            |                            |             |      |

\*x-y-z define the blends, x: 1a, 1b or 1c, y: 2a, 2b or 2c, z: 1a, 1b, 1c

\*Corresponding author: Sezgin Bakirdere, email: bsezgin23@yahoo.com, Phone:

+902123834245

**Table S6.** Blends preparation for ID<sup>4</sup>-GC-MS.

| <b>Blends</b>                 | <b>Code</b> | <b>m<sub>A*</sub>, g</b> | <b>m<sub>B</sub>, g</b> | <b>r<sub>A*/B</sub>, PA/PA</b> |
|-------------------------------|-------------|--------------------------|-------------------------|--------------------------------|
| <b>Calibration<br/>Blends</b> | A*B-1-a     | 0.801                    | 0.398                   | 2.99                           |
|                               | A*B-1-b     | 0.806                    | 0.400                   | 3.05                           |
|                               | A*B-1-c     | 0.809                    | 0.398                   | 3.08                           |
|                               | A*B-2-a     | 0.600                    | 0.599                   | 1.86                           |
|                               | A*B-2-b     | 0.603                    | 0.599                   | 1.86                           |
|                               | A*B-2-c     | 0.600                    | 0.602                   | 1.85                           |
|                               | A*B-3-a     | 0.400                    | 0.795                   | 0.87                           |
|                               | A*B-3-b     | 0.399                    | 0.799                   | 0.91                           |
|                               | A*B-3-c     | 0.404                    | 0.807                   | 0.92                           |
| <b>Sample Blends</b>          | AB-a        | 0.607                    | 0.602                   | 1.86                           |
|                               | AB-b        | 0.606                    | 0.599                   | 1.83                           |
|                               | AB-c        | 0.602                    | 0.600                   | 1.82                           |

*\*Corresponding author: Sezgin Bakirdere, email: bsezgin23@yahoo.com, Phone:*

*+902123834245*

**Table S7.** Theoretical and experimental concentrations of the analyte, percent recovery results and percent relative standard deviation for ID<sup>4</sup>-GC-MS.

| Combination, x-y-z-t | w <sub>A</sub> ,<br>µg/g | Eu (w <sub>A</sub> ), µg/g | Et (w <sub>A</sub> ), µg/g | Recovery, % | RSD% |
|----------------------|--------------------------|----------------------------|----------------------------|-------------|------|
| 1a-2a-3a-1a          | 10.15                    |                            |                            |             |      |
| 1a-2a-3a-1b          | 9.85                     |                            |                            |             |      |
| 1a-2a-3a-1c          | 9.95                     |                            |                            |             |      |
| 1a-2a-3b-1a          | 10.15                    |                            |                            |             |      |
| 1a-2a-3b-1b          | 9.96                     |                            |                            |             |      |
| 1a-2a-3b-1c          | 9.98                     |                            |                            |             |      |
| 1a-2a-3c-1a          | 10.15                    |                            |                            |             |      |
| 1a-2a-3c-1b          | 9.96                     |                            |                            |             |      |
| 1a-2a-3c-1c          | 9.98                     |                            |                            |             |      |
| 1a-2b-3a-1a          | 10.21                    |                            |                            |             |      |
| 1a-2b-3a-1b          | 9.97                     |                            |                            |             |      |
| 1a-2b-3a-1c          | 9.99                     |                            |                            |             |      |
| 1a-2b-3b-1a          | 10.21                    |                            |                            |             |      |
| 1a-2b-3b-1b          | 10.02                    | 10.06                      | 10.02                      | 100.4       | 1.0  |
| 1a-2b-3b-1c          | 10.04                    |                            |                            |             |      |
| 1a-2b-3c-1a          | 10.21                    |                            |                            |             |      |
| 1a-2b-3c-1b          | 10.02                    |                            |                            |             |      |
| 1a-2b-3c-1c          | 10.04                    |                            |                            |             |      |
| 1a-2c-3a-1a          | 10.20                    |                            |                            |             |      |
| 1a-2c-3a-1b          | 10.01                    |                            |                            |             |      |
| 1a-2c-3a-1c          | 10.03                    |                            |                            |             |      |
| 1a-2c-3b-1a          | 10.20                    |                            |                            |             |      |
| 1a-2c-3b-1b          | 10.01                    |                            |                            |             |      |
| 1a-2c-3b-1c          | 10.03                    |                            |                            |             |      |
| 1a-2c-3c-1a          | 10.20                    |                            |                            |             |      |
| 1a-2c-3c-1b          | 10.01                    |                            |                            |             |      |
| 1a-2c-3c-1c          | 10.03                    |                            |                            |             |      |

*\*Corresponding author: Sezgin Bakirdere, email: bsezgin23@yahoo.com, Phone:*

*+902123834245*



---

|                    |       |
|--------------------|-------|
| <b>1b-2a-3a-1a</b> | 10.15 |
| <b>1b-2a-3a-1b</b> | 9.86  |
| <b>1b-2a-3a-1c</b> | 9.96  |
| <b>1b-2a-3b-1a</b> | 10.15 |
| <b>1b-2a-3b-1b</b> | 9.97  |
| <b>1b-2a-3b-1c</b> | 9.99  |
| <b>1b-2a-3c-1a</b> | 10.15 |
| <b>1b-2a-3c-1b</b> | 9.96  |
| <b>1b-2a-3c-1c</b> | 9.98  |
| <b>1b-2b-3a-1a</b> | 10.21 |
| <b>1b-2b-3a-1b</b> | 9.97  |
| <b>1b-2b-3a-1c</b> | 9.99  |
| <b>1b-2b-3b-1a</b> | 10.21 |
| <b>1b-2b-3b-1b</b> | 10.02 |
| <b>1b-2b-3b-1c</b> | 10.04 |
| <b>1b-2b-3c-1a</b> | 10.21 |
| <b>1b-2b-3c-1b</b> | 10.02 |
| <b>1b-2b-3c-1c</b> | 10.04 |
| <b>1b-2c-3a-1a</b> | 10.20 |
| <b>1b-2c-3a-1b</b> | 10.02 |
| <b>1b-2c-3a-1c</b> | 10.04 |
| <b>1b-2c-3b-1a</b> | 10.20 |
| <b>1b-2c-3b-1b</b> | 10.01 |
| <b>1b-2c-3b-1c</b> | 10.03 |
| <b>1b-2c-3c-1a</b> | 10.20 |
| <b>1b-2c-3c-1b</b> | 10.01 |
| <b>1b-2c-3c-1c</b> | 10.03 |
| <b>1c-2a-3a-1a</b> | 10.15 |
| <b>1c-2a-3a-1b</b> | 9.86  |
| <b>1c-2a-3a-1c</b> | 9.96  |
| <b>1c-2a-3b-1a</b> | 10.15 |
| <b>1c-2a-3b-1b</b> | 9.97  |

---

*\*Corresponding author: Sezgin Bakirdere, email: bsezgin23@yahoo.com, Phone:*

*+902123834245*

---

|                    |       |
|--------------------|-------|
| <b>1c-2a-3b-1c</b> | 9.99  |
| <b>1c-2a-3c-1a</b> | 10.15 |
| <b>1c-2a-3c-1b</b> | 9.97  |
| <b>1c-2a-3c-1c</b> | 9.99  |
| <b>1c-2b-3a-1a</b> | 10.21 |
| <b>1c-2b-3a-1b</b> | 9.97  |
| <b>1c-2b-3a-1c</b> | 9.99  |
| <b>1c-2b-3b-1a</b> | 10.21 |
| <b>1c-2b-3b-1b</b> | 10.02 |
| <b>1c-2b-3b-1c</b> | 10.04 |
| <b>1c-2b-3c-1a</b> | 10.21 |
| <b>1c-2b-3c-1b</b> | 10.02 |
| <b>1c-2b-3c-1c</b> | 10.04 |
| <b>1c-2c-3a-1a</b> | 10.20 |
| <b>1c-2c-3a-1b</b> | 10.02 |
| <b>1c-2c-3a-1c</b> | 10.04 |
| <b>1c-2c-3b-1a</b> | 10.20 |
| <b>1c-2c-3b-1b</b> | 10.01 |
| <b>1c-2c-3b-1c</b> | 10.03 |
| <b>1c-2c-3c-1a</b> | 10.20 |
| <b>1c-2c-3c-1b</b> | 10.01 |
| <b>1c-2c-3c-1c</b> | 10.03 |

---

\*x-y-z-t define the blends, x: 1a, 1b or 1c, y: 2a, 2b or 2c, z: 3a, 3b, 3c, t: 1a, 1b, 1c

**\*Corresponding author:** Sezgin Bakirdere, email: bsezgin23@yahoo.com, Phone:

+902123834245

**Table S8.** Blends preparation for SA-ID<sup>2</sup>-GC-MS.

| <b>Blends</b>                        | <b>Code</b> | <b>m<sub>A</sub>, g</b> | <b>m<sub>A*</sub>, g</b> | <b>m<sub>B</sub>, g</b> | <b>m<sub>w</sub>, g</b> | <b>r<sub>A*/A/B</sub>,<br/>PA/PA</b> |
|--------------------------------------|-------------|-------------------------|--------------------------|-------------------------|-------------------------|--------------------------------------|
| <b>Calibration/Sample<br/>Blends</b> | AA*B-1-a    | 0.400                   | -                        | 0.397                   | 0.401                   | 2.50                                 |
|                                      | AA*B-1-b    | 0.398                   | -                        | 0.397                   | 0.401                   | 2.50                                 |
|                                      | AA*B-1-c    | 0.400                   | -                        | 0.401                   | 0.402                   | 2.50                                 |
|                                      | AA*B-2-a    | 0.400                   | 0.400                    | 0.399                   | -                       | 5.14                                 |
|                                      | AA*B-2-b    | 0.401                   | 0.401                    | 0.401                   | -                       | 4.86                                 |
|                                      | AA*B-2-c    | 0.404                   | 0.402                    | 0.394                   | -                       | 4.94                                 |

**\*Corresponding author:** Sezgin Bakirdere, email: bsezgin23@yahoo.com, Phone:

+902123834245

**Table S9.** Theoretical and experimental concentrations of the analyte, percent recovery results and percent relative standard deviation for SA-ID<sup>2</sup>-GC-MS

| Combination, x-y | w <sub>A</sub> , µg/g | Eu (w <sub>A</sub> ), µg/g | Et (w <sub>A</sub> ), µg/g | Recovery, % | RSD% |
|------------------|-----------------------|----------------------------|----------------------------|-------------|------|
| <b>1a-2a</b>     | 9.30                  |                            |                            |             |      |
| <b>1a-2b</b>     | 10.33                 |                            |                            |             |      |
| <b>1a-2c</b>     | 10.49                 |                            |                            |             |      |
| <b>1b-2a</b>     | 9.41                  |                            |                            |             |      |
| <b>1b-2b</b>     | 10.46                 | 10.16                      | 9.99                       | 101.7       | 5.7  |
| <b>1b-2c</b>     | 10.62                 |                            |                            |             |      |
| <b>1c-2a</b>     | 9.50                  |                            |                            |             |      |
| <b>1c-2b</b>     | 10.56                 |                            |                            |             |      |
| <b>1c-2c</b>     | 10.73                 |                            |                            |             |      |

\*x-y-z define the blends, x: 1a, 1b or 1c, y: 2a, 2b or 2c

**\*Corresponding author:** Sezgin Bakirdere, email: bsezgin23@yahoo.com, Phone: +902123834245

**Table S10.** Blends preparation for SA-ID<sup>3</sup>-GC-MS.

| <b>Blends</b>                        | <b>Code</b> | <b>m<sub>A</sub>, g</b> | <b>m<sub>A*</sub>, g</b> | <b>m<sub>B</sub>, g</b> | <b>m<sub>w</sub>, g</b> | <b>r<sub>A*/A/B</sub>,<br/>PA/PA</b> |
|--------------------------------------|-------------|-------------------------|--------------------------|-------------------------|-------------------------|--------------------------------------|
| <b>Calibration/Sample<br/>Blends</b> | AA*B-1-a    | 0.402                   | -                        | 0.396                   | 0.404                   | 1.99                                 |
|                                      | AA*B-1-b    | 0.399                   | -                        | 0.399                   | 0.399                   | 1.98                                 |
|                                      | AA*B-1-c    | 0.403                   | -                        | 0.408                   | 0.401                   | 1.93                                 |
|                                      | AA*B-2-a    | 0.402                   | 0.398                    | 0.393                   | -                       | 4.56                                 |
|                                      | AA*B-2-b    | 0.401                   | 0.401                    | 0.399                   | -                       | 4.53                                 |
|                                      | AA*B-2-c    | 0.401                   | 0.403                    | 0.406                   | -                       | 4.65                                 |
|                                      | AA*B-3-a    | 0.402                   | 0.202                    | 0.598                   | -                       | 2.00                                 |
|                                      | AA*B-3-b    | 0.402                   | 0.201                    | 0.603                   | -                       | 1.98                                 |
|                                      | AA*B-3-c    | 0.403                   | 0.200                    | 0.592                   | -                       | 2.00                                 |

**\*Corresponding author:** Sezgin Bakirdere, email: bsezgin23@yahoo.com, Phone:

+902123834245

**Table S11.** Theoretical and experimental concentrations of the analyte, percent recovery results and percent relative standard deviation for SA-ID<sup>3</sup>-GC-MS.

| Combination, x-y-z | w <sub>A</sub> , µg/g | Eu (w <sub>A</sub> ), µg/g | Et (w <sub>A</sub> ), µg/g | Recovery, % | RSD% |
|--------------------|-----------------------|----------------------------|----------------------------|-------------|------|
| 1a-2a-3a           | 9.96                  |                            |                            |             |      |
| 1a-2a-3b           | 9.90                  |                            |                            |             |      |
| 1a-2a-3c           | 10.26                 |                            |                            |             |      |
| 1a-2b-3a           | 9.96                  |                            |                            |             |      |
| 1a-2b-3b           | 9.90                  |                            |                            |             |      |
| 1a-2b-3c           | 10.26                 |                            |                            |             |      |
| 1a-2c-3a           | 9.96                  |                            |                            |             |      |
| 1a-2c-3b           | 9.89                  |                            |                            |             |      |
| 1a-2c-3c           | 10.26                 |                            |                            |             |      |
| 1b-2a-3a           | 10.23                 |                            |                            |             |      |
| 1b-2a-3b           | 10.16                 |                            |                            |             |      |
| 1b-2a-3c           | 10.55                 |                            |                            |             |      |
| 1b-2b-3a           | 10.23                 |                            |                            |             |      |
| 1b-2b-3b           | 10.16                 | 10.16                      | 10.02                      | 101.4       | 2.1  |
| 1b-2b-3c           | 10.55                 |                            |                            |             |      |
| 1b-2c-3a           | 10.25                 |                            |                            |             |      |
| 1b-2c-3b           | 10.17                 |                            |                            |             |      |
| 1b-2c-3c           | 10.57                 |                            |                            |             |      |
| 1c-2a-3a           | 10.00                 |                            |                            |             |      |
| 1c-2a-3b           | 9.93                  |                            |                            |             |      |
| 1c-2a-3c           | 10.33                 |                            |                            |             |      |
| 1c-2b-3a           | 10.01                 |                            |                            |             |      |
| 1c-2b-3b           | 9.94                  |                            |                            |             |      |
| 1c-2b-3c           | 10.34                 |                            |                            |             |      |
| 1c-2c-3a           | 10.08                 |                            |                            |             |      |
| 1c-2c-3b           | 9.99                  |                            |                            |             |      |
| 1c-2c-3c           | 10.41                 |                            |                            |             |      |

\*x-y-z define the blends, x: 1a, 1b or 1c, y: 2a, 2b or 2c, z: 3a, 3b, 3c

**\*Corresponding author:** Sezgin Bakirdere, email: bsezgin23@yahoo.com, Phone:

+902123834245
